# Supplementary material for: Novel biocompatible electrospun gelatin fiber mats with antibiotic drug delivery properties
Source: Royal Society of Chemistry journal article supplement (doi:10.1039/c5tb01897h), 2015-12-30
Supplement: c5tb01897h1.pdf [file c5tb01897h1.pdf]

## Novel biocompatible electrospun gelatin fibers mat with antibiotic drug delivery properties

Sakthivel Nagarajan<sup>a,b</sup>, Laurence Soussan<sup>a</sup>, Mikhael Bechelany<sup>a</sup>, Catherine Teyssier<sup>c</sup>, Vincent Cavallès<sup>c</sup>, Celine Pochat-Bohatier<sup>a</sup>, Philippe Miele<sup>a</sup>, Narayana Kalkura<sup>b</sup>, Jean-Marc Janot<sup>a</sup>, and Sebastien Balme<sup>a\*</sup>

### Viscosity of the polymer solutions analyzed at various temperatures

The viscosity of the polymer solution is a very important parameter which affects fiber formation. The viscosity of the polymer solutions analyzed at various temperatures is shown in Figure S11. The viscosity achieved at 35°C is highly suitable to obtain fibers of uniform size without beads during electrospinning.

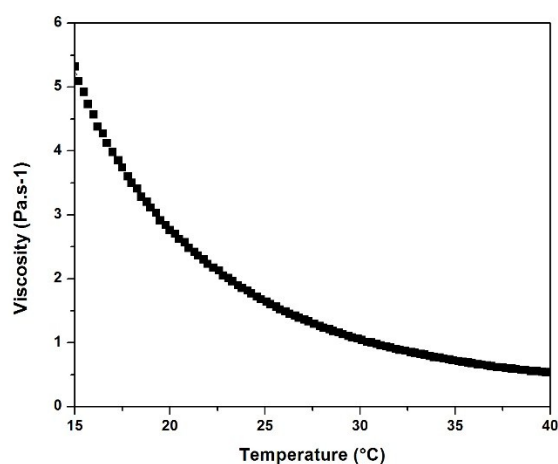

**Figure S11.** Viscosity of the polymer solutions at various temperatures

## Gelatin release

The Gelatin release profile observed at 275 nm is shown at Figure S12. The drug chlorohexidine produces a maximum of absorption at 265 nm, hence drug release interferes with the Gelatin release. To predict the release mechanism of the ESM, a model using rhodamine has been employed.

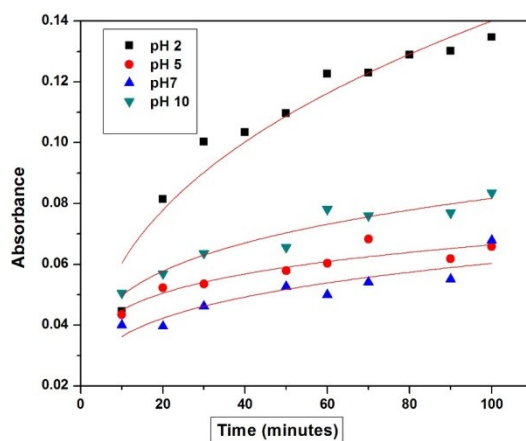

**Figure S12.** Gelatin release profile at different pHs

### Rhodamine release 72 hours

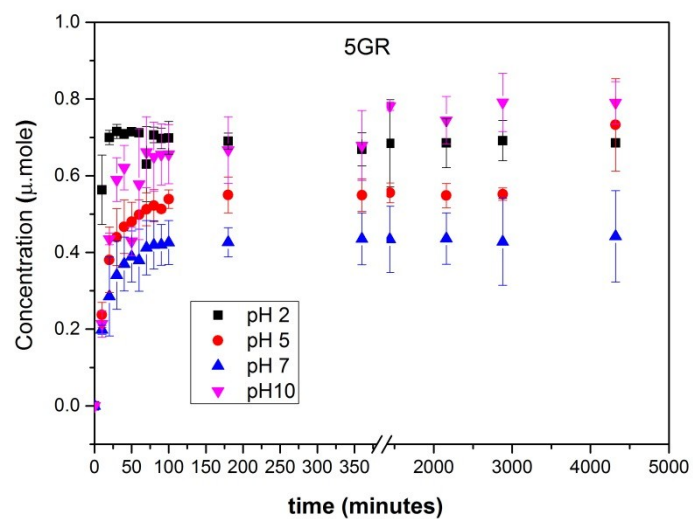

Figure S13. Rhodamine release profile
